# Supplementary material
Source: PubMed Central journal article supplement (PMC2806885)
Supplement: jn.109.112573_1.pdf [file jn.109.112573_1.pdf]

**SUPPLEMENTAL TABLE 1** The Food Security Survey Module (adult-referenced items only)<sup>1</sup>

| Question                                                                                                                                                                                                                                       | Affirmative Response                                  |
|------------------------------------------------------------------------------------------------------------------------------------------------------------------------------------------------------------------------------------------------|-------------------------------------------------------|
| I am going to read you several statements that people have made about their food situation. For these statements, please tell me whether the statement was often true, sometimes true, or never true for your household in the last 12 months. |                                                       |
| 1. We worried whether our food would run out before we got money to buy more.                                                                                                                                                                  | Often or sometimes true                               |
| 2. The food we bought just didn't last, and we didn't have money to get more. [Often/sometimes/never true]                                                                                                                                     | Often or sometimes true                               |
| 3. We couldn't afford to eat balanced meals. [Often/sometimes/never true]                                                                                                                                                                      | Often or sometimes true                               |
| 4. In the last 12 months, did you or other adults in your household ever cut the size of your meals or skip meals because there was not enough money for food? [Yes/no]                                                                        | Yes                                                   |
| [If yes:] 5. How often did this happen? [Almost every month/some months but not every month/in only one or two months]                                                                                                                         | Almost every month or some months but not every month |
| 6. In the last 12 months, did you ever eat less than you felt you should because there wasn't enough money to buy food? [Yes/no]                                                                                                               | Yes                                                   |
| 7. In the last 12 months, were you ever hungry but didn't eat because you couldn't afford enough food? [Yes/no]                                                                                                                                | Yes                                                   |
| 8. In the last 12 months, did you lose weight because you didn't have enough money for food? [Yes/no]                                                                                                                                          | Yes                                                   |
| 9. In the last 12 months, did you or other adults in your household ever not eat for a whole day because there wasn't enough money for food? [Yes/no]                                                                                          | Yes                                                   |
| [If yes:] 10. How often did this happen? [Almost every month/some months but not every month/in only one or two months]                                                                                                                        | Almost every month or some months but not every month |

<sup>1</sup>Adults are considered food secure if  $\leq 2$  responses are affirmative and insecure if  $\geq 3$  responses are affirmative.
